# Supplementary material
Source: Springer Nature journal article supplement (https://www.springermedizin.de/resource/supplementary/12913_2013_3010_MOESM5_ESM.pdf/9533274)

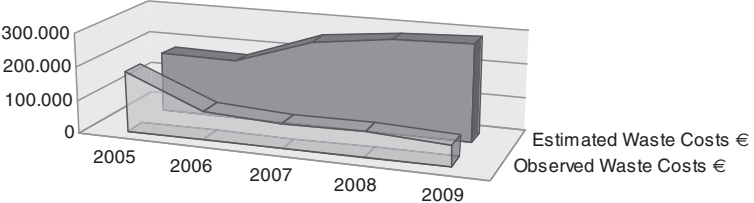

|                         | 2005    | 2006    | 2007    | 2008    | 2009    |
|-------------------------|---------|---------|---------|---------|---------|
| Observed Waste Costs €  | 179,576 | 85,982  | 73,975  | 75,909  | 62,994  |
| Estimated Waste Costs € | 179,576 | 175,079 | 254,176 | 280,843 | 288,148 |

Supplement: MOESM5 [file 9533274]
